# Supplementary material for: Hormone replacement therapy is associated with improved cognition and larger brain volumes in at-risk APOE4 women: results from the European Prevention of Alzheimer’s Disease (EPAD) cohort
Source: PubMed Central journal article supplement (PMC9830747; doi:10.1186/s13195-022-01121-5), 2023-01-09
Supplement: 13195_2022_1121_MOESM3_ESM.pdf [file 13195_2022_1121_MOESM3_ESM.pdf]

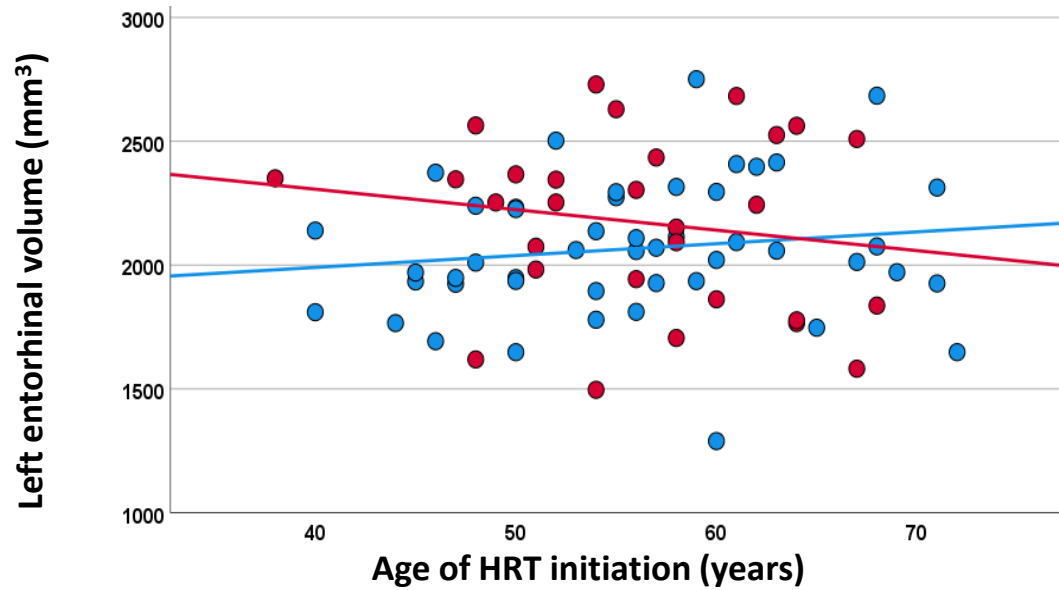

Non-APOE4: standardized  $\beta$ = 0.147 (p=0.193)  
 APOE4: standardized  $\beta$ = - 0.125 (p=0.710)

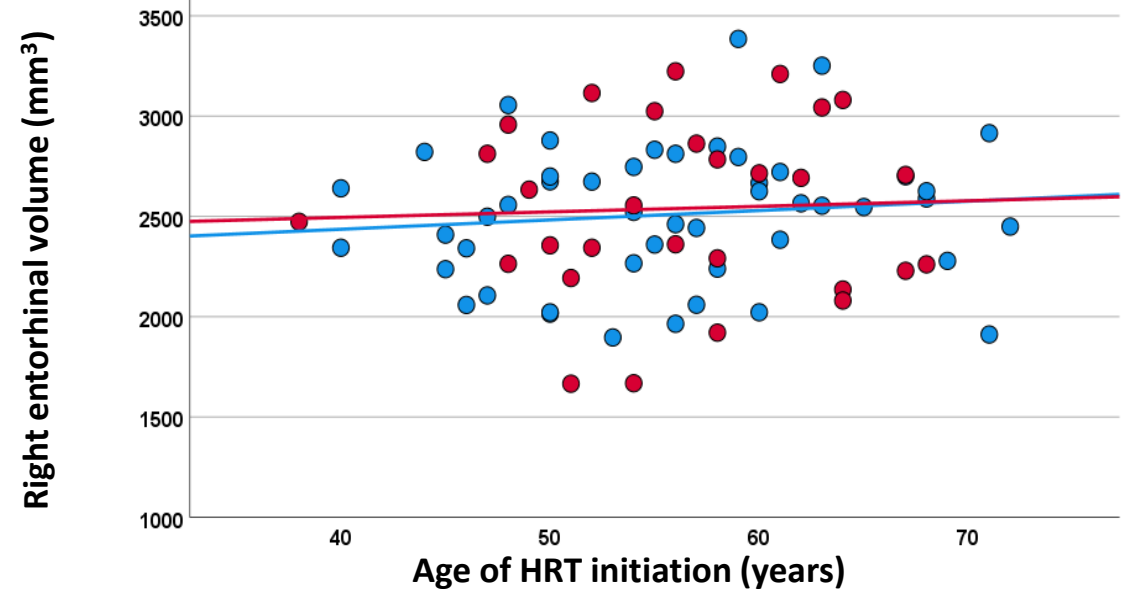

Non-APOE4: standardized  $\beta$ = 0.118(p=0.379)  
 APOE4: standardized  $\beta$ = 0.194(p=0.385)

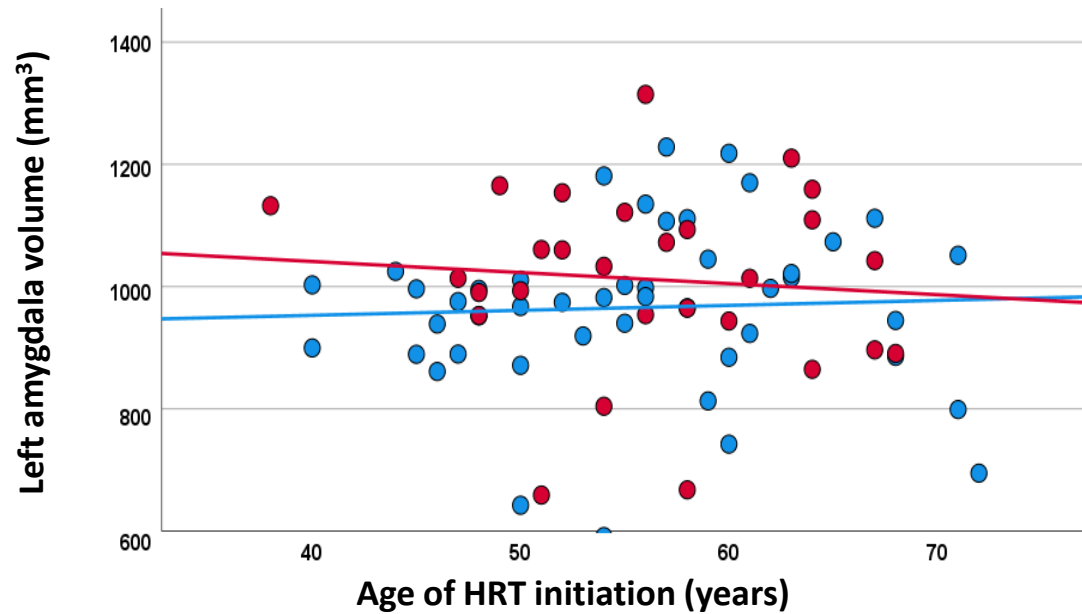

Non-APOE4: standardized  $\beta$ = 0.144(p= 0.506)  
 APOE4: standardized  $\beta$ = -0.025 (p=0.911)

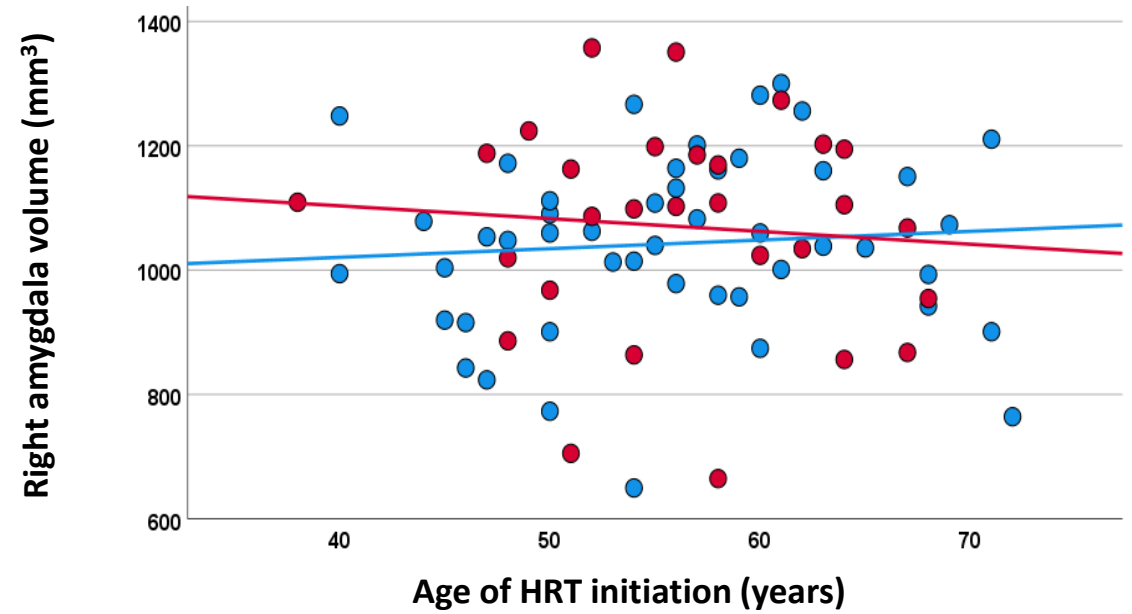

Non-APOE4: standardized  $\beta$ = 0.126 (p=0.406)  
 APOE4: standardized  $\beta$ = - 0.023(p=0.896)
